# Supplementary material
Source: ML conference proceedings conference paper supplement (https://openaccess.thecvf.com/content/CVPR2022/html/Ishida_Towards_Real-World_Navigation_CVPR_2022_paper.html)
Supplement: Supplementary file 2 [file Ishida_Towards_Real-World_Navigation_CVPR_2022_supplemental.zip]

Archive with 4 entries (4 files):
- 05244-supp/CALVIN Active Vision Dataset.mp4
- 05244-supp/CALVIN Grid (Embodied).mp4
- 05244-supp/CALVIN MiniWorld.mp4
- 05244-supp/CVPR2022_CALVIN_supplementary.pdf
